# Supplementary material
Source: PubMed Central journal article supplement (PMC8563406)
Supplement: NIHMS1729167-supplement-2.pdf [file NIHMS1729167-supplement-2.pdf]

**Supplementary Table 1 - KEY RESOURCES TABLE**

| REAGENT or RESOURCE                                           | SOURCE            | IDENTIFIER       |
|---------------------------------------------------------------|-------------------|------------------|
| BV786 anti-mouse CD45                                         | BD                | RRID:AB_2716861  |
| APC anti-mouse CD45                                           | BD Biosciences    | RRID:AB_10584326 |
| BV711 anti-mouse CD11b                                        | BD                | RRID:AB_2716860  |
| PE/Cy7 anti-mouse/human CD11b                                 | BioLegend         | RRID:AB_312799   |
| APC anti-mouse F4/80                                          | BioLegend         | RRID:AB_893481   |
| PE anti-mouse F4/80                                           | BioLegend         | RRID:AB_893486   |
| BV421 MHC II (IA-IE)                                          | BD                | RRID:AB_2716857  |
| APC-Cy7 anti-mouse Ly6C                                       | BioLegend         | RRID:AB_10640120 |
| BUV395 anti-mouse Ly6G                                        | BD                | RRID:AB_2716852  |
| BV605 anti-mouse CD11c                                        | BD                | RRID:AB_2737978  |
| PE-Cy7 anti-mouse CD103                                       | BioLegend         | RRID:AB_2563691  |
| BUV737 anti-mouse CD19                                        | BD                | RRID:AB_2716855  |
| PerCP-Cy5.5 anti-mouse CD3e                                   | BD                | RRID:AB_1727463  |
| BV650 anti-mouse CD4                                          | BD                | RRID:AB_2716859  |
| BUV800 anti-mouse CD8a                                        | BD                | RRID:AB_2716856  |
| Anti-rabbit Alexa Fluor 555                                   | Fisher Scientific | RRID:AB_162543   |
| Anti-rabbit Alexa Fluor 647                                   | Fisher Scientific | RRID:AB_2536183  |
| Anti-ERG antibody [EPR3864]                                   | Abcam             | RRID:AB_2630401  |
| Anti-alpha smooth muscle Actin antibody                       | Sigma-Aldrich     | RRID:AB_476856   |
| Anti-Androgen Receptor antibody                               | Abcam             | RRID:AB_11156085 |
| <b>Bacterial and Virus Strains</b>                            |                   |                  |
| -                                                             |                   |                  |
| <b>Biological Samples</b>                                     |                   |                  |
| -                                                             |                   |                  |
| <b>Chemicals, Peptides, and Recombinant Proteins</b>          |                   |                  |
| M-CSF                                                         | R&D Systems       | Cat#416-ML-050   |
| IFN- $\gamma$                                                 | R&D Systems       | Cat#485-MI-100   |
| LPS                                                           | Sigma Aldrich     | Cat# L2630-10mg  |
| IL-4                                                          | R&D Systems       | Cat# 404-ML-050  |
| Enzalutamide (MDV3100)                                        | Selleck Chemicals | S1250-5mg        |
| Charcoal stripped serum                                       | Sigma-Aldrich     | F6765-100ML      |
| VECTASHIELD® Antifade Mounting Medium with DAPI               | Vector Biolabs    | H-1200           |
| InVivoMAb Rat IgG1                                            | BioXCell          | BE0088           |
| InVivoMAb anti-mouse CSF1 (clone 5A1)                         | BioXCell          | BE0204           |
| Dehydroepiandrosterone (DHEA) solution, 1.0 mg/mL in methanol | Sigma-Aldrich     | D-063-1ML        |
| DMEM, high glucose, HEPES                                     | Fisher Scientific | 12430054         |
| DMEM, high glucose, HEPES, no phenol red                      | Thermo Fisher     | 21063029         |
| Insulin from bovine pancreas                                  | Sigma-Aldrich     | 6634-100MG       |
| <b>Critical Commercial Assays</b>                             |                   |                  |
| Zombie NIR™ Fixable Viability Kit                             | BioLegend         | 423105           |
| Kappa Library quantification                                  | Roche             | Cat#KK4854       |
| Ovation Mouse RNAseq System                                   | Tecan             | Cat#0348-32      |

|                                                                                               |                        |                          |         |
|-----------------------------------------------------------------------------------------------|------------------------|--------------------------|---------|
| Testosterone Parameter Assay Kit                                                              | R&D Systems            | PKGE010                  |         |
| Vybrant™ Alexa Fluor™ 555 Lipid Raft Labeling Kit                                             | Fisher Scientific      | Cat#V34404               |         |
| Image-iT™ LDL Uptake Kit, pHrodo™ Red                                                         | Thermo Fisher          | I34360                   |         |
| TaqMan™ RNA-to-CT™ 1-Step Kit                                                                 | Thermo Fisher          | 4392938                  |         |
| RNeasy isolation kit                                                                          | Qiagen                 | Cat#74134                |         |
| Cellstripper non-enzymatic cell dissociation solution                                         | Fisher Scientific      | Cat#MT-25-056CI          |         |
| Deposited Data                                                                                |                        |                          |         |
| Whole tumor RNAseq                                                                            |                        | GSE180270                |         |
| Experimental Models: Cell Lines                                                               |                        |                          |         |
| TRAMP-C2                                                                                      | ATCC                   | Cat# CRL-2731            |         |
| TRAMP-C3                                                                                      | ATCC                   | Cat# CRL-2732            |         |
| RAW 264.7                                                                                     | ATCC                   | Cat# TIB-71              |         |
| Experimental Models: Organisms/Strains                                                        |                        |                          |         |
| Mouse: C57BL/6N (C57BL/6NHsd)                                                                 | Envigo                 | N/A                      |         |
| Mouse: C57BL/6NJ                                                                              | The Jackson Laboratory | 005304                   |         |
| Mouse: Trp53 <sup>tm1Bm</sup> /J                                                              | The Jackson Laboratory | 008462                   |         |
| Mouse: Pten <sup>tm1Hwu</sup> /J                                                              | The Jackson Laboratory | 006440                   |         |
| Mouse: C57BL/6-Tg(Pbsn-cre/Esr1*)14Abch/J<br>"ProbasinBAC-MerCreMer"                          | The Jackson Laboratory | 020287                   |         |
| Mouse: B6.129-Gt(ROSA)26Sor <sup>tm1(TMPRSS2/ERG)Key</sup> /J<br>"Rosa26 <sup>ERG/ERG</sup> " | The Jackson Laboratory | 024512                   |         |
| Mouse: B6.Cg-Abca1 <sup>tm1Jp</sup> Abcg1 <sup>tm1Tail</sup> /J                               | The Jackson Laboratory | 021067                   |         |
| Mouse: B6.129P2-Lyz2 <sup>tm1(cre)lfo</sup> /J                                                | The Jackson Laboratory | 004781                   |         |
| Oligonucleotides (Primers)                                                                    |                        |                          |         |
| Cd36                                                                                          | Mm00432403_m1          | Thermo Fisher Scientific | 4453320 |
| Abcg1                                                                                         | Mm00437390_m1          | Thermo Fisher Scientific | 4453320 |
| Ar                                                                                            | Mm00442688_m1          | Thermo Fisher Scientific | 4453320 |
| Abca1                                                                                         | Mm00442646_m1          | Thermo Fisher Scientific | 4453320 |
| Chga                                                                                          | Mm00514341_m1          | Thermo Fisher Scientific | 4453320 |
| Krt18                                                                                         | Mm01601704_g1          | Thermo Fisher Scientific | 4453320 |
| Krt8                                                                                          | Mm04209403_g1          | Thermo Fisher Scientific | 4331182 |
| TBP                                                                                           | Mm01277042_m1          | Thermo Fisher Scientific | 4331182 |
| Krt14                                                                                         | Mm00516876_m1          | Thermofisher Scientific  | 4453320 |

|                         |               |                          |         |
|-------------------------|---------------|--------------------------|---------|
| fkbp5                   | Mm00487406_m1 | Thermo Scientific        | 4331182 |
| Scarb1                  | Mm00450234_m1 | Thermo Fisher Scientific | 4453320 |
| Tmprss2                 | Mm00443687_m1 | Thermo Fisher Scientific | 4448892 |
| Syp                     | Mm00436850_m1 | Thermo Fisher Scientific | 4453320 |
| Recombinant DNA         |               |                          |         |
| -                       |               |                          |         |
| Software and Algorithms |               |                          |         |
| R                       |               |                          | N/A     |
| Other                   |               |                          |         |
| -                       |               |                          |         |
