# Supplementary material
Source: PubMed Central journal article supplement (PMC8563406)
Supplement: NIHMS1729167-supplement-3.pdf [file NIHMS1729167-supplement-3.pdf]

**Figure S1**

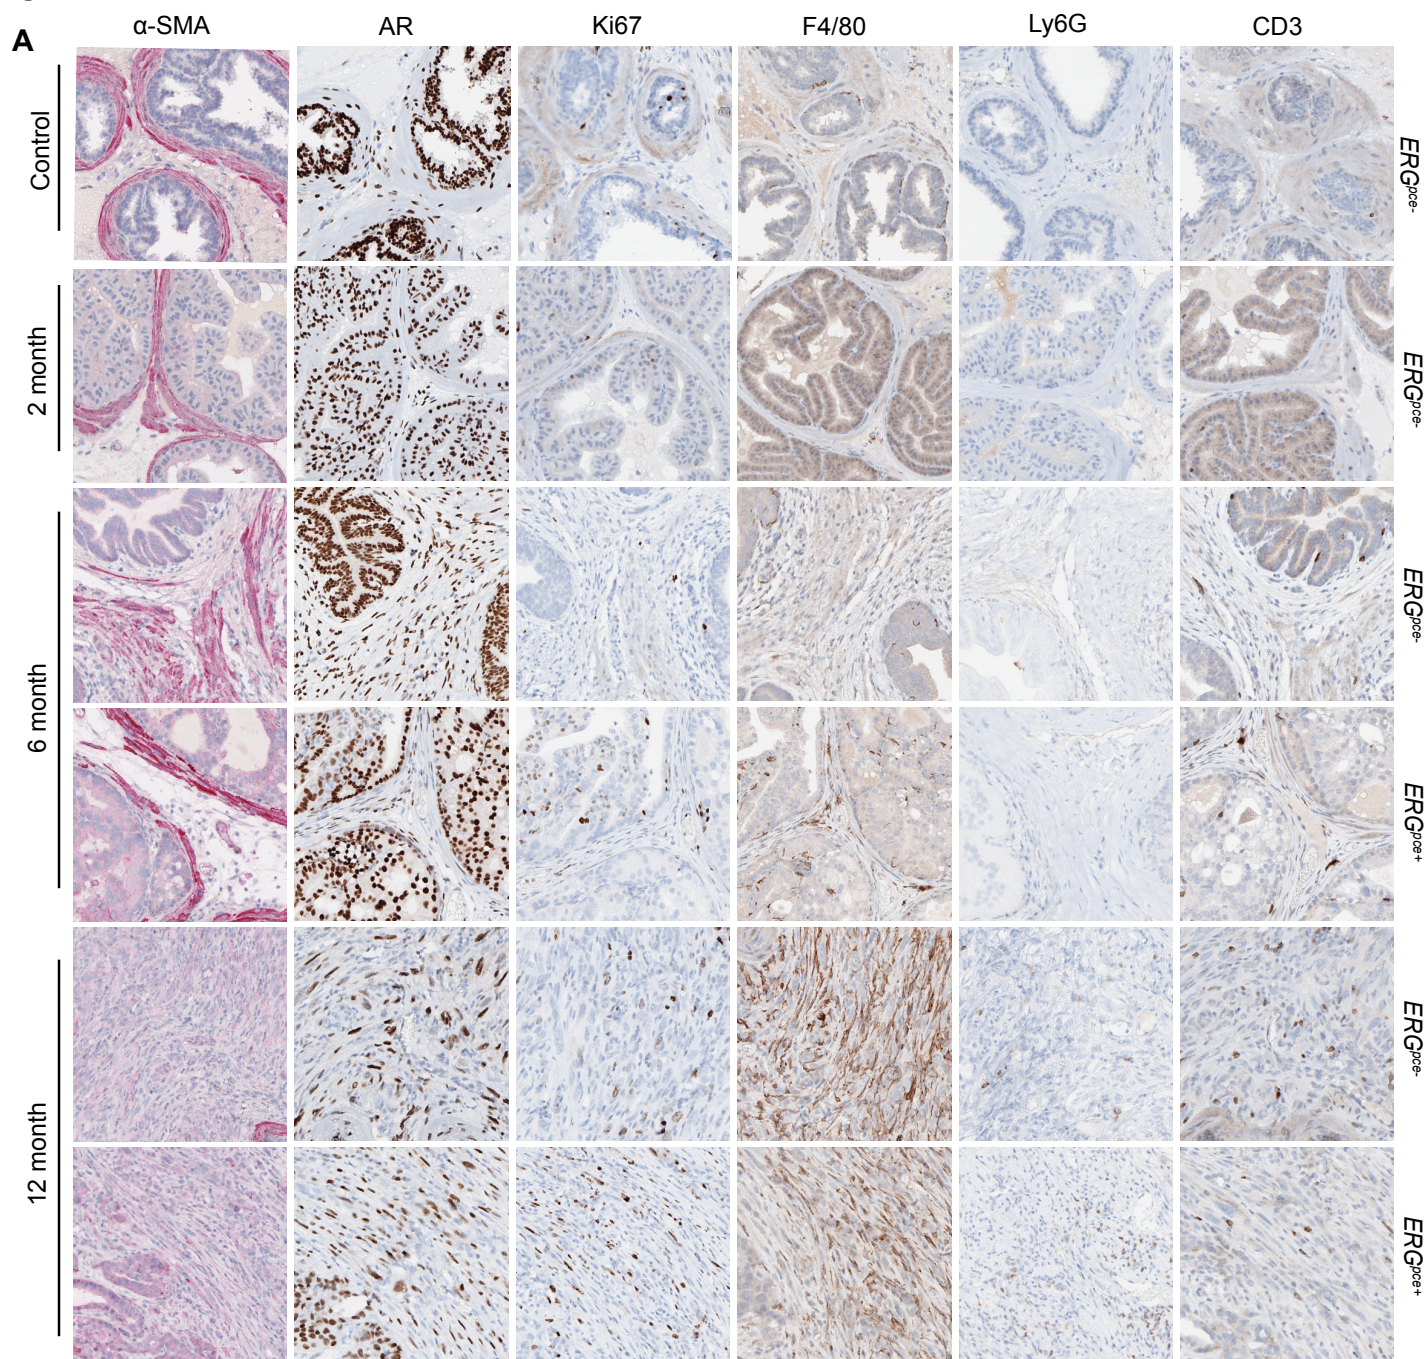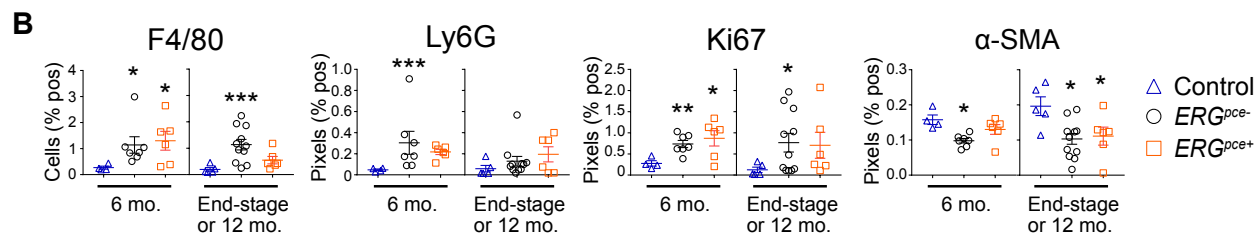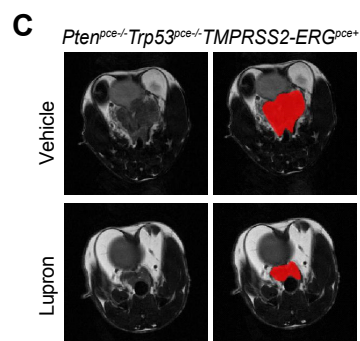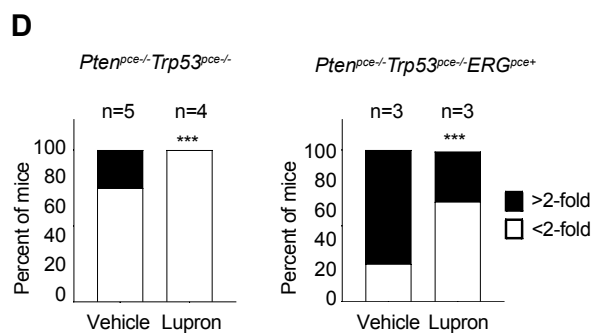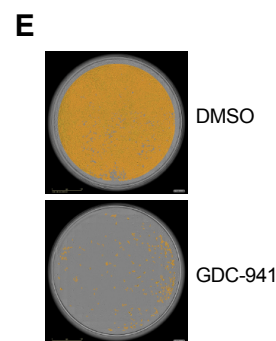

**Supplementary Figure 1, Related to Figure 1.** A) Representative images from formalin-fixed, paraffin-embedded prostate tissue, isolated from control (age-matched C57BL6/J or untreated transgenic animals) or 2, 6, or 12 months post tamoxifen administration to *Pten<sup>pce-/-</sup>/Trp53<sup>pce-/-</sup>* or *Pten<sup>pce-/-</sup>/Trp53<sup>pce-/-</sup>/TMPRSS2-ERG<sup>pce+</sup>* animals. B) Quantification of F4/80 positive cells, or percent pixel positivity for Ly6G, Ki67, and  $\alpha$ -SMA, in the tissue from A. n=2-5 age-matched control animals or n=13-16 tamoxifen-treated transgenic mice, pooled from two independent cohorts. Data shown as the mean  $\pm$  SEM. Significance was determined by an unpaired t test with Welch's correction. C) Representative T2-weighted image by MRI of tumor-bearing *Pten<sup>pce-/-</sup>/Trp53<sup>pce-/-</sup>/TMPRSS2-ERG<sup>pce+</sup>* mice treated with vehicle or 0.6 mg Lupron subcutaneously every 28 days for two cycles, starting 4 months after tamoxifen administration. D) Percent of mice progressing on Lupron, as measured by doubling tumor volume post treatment (>2-fold) or below this threshold (<2-fold). n=3-5 mice per group, with significance determined by Fisher's exact test. E) PTE-24 cells were treated with 1  $\mu$ M GDC-941 for 72 hrs and phase contrast images were acquired.
