# Supplementary material
Source: PubMed Central journal article supplement (PMC8563406)
Supplement: NIHMS1729167-supplement-6.pdf [file NIHMS1729167-supplement-6.pdf]

**Figure S4**

**A**

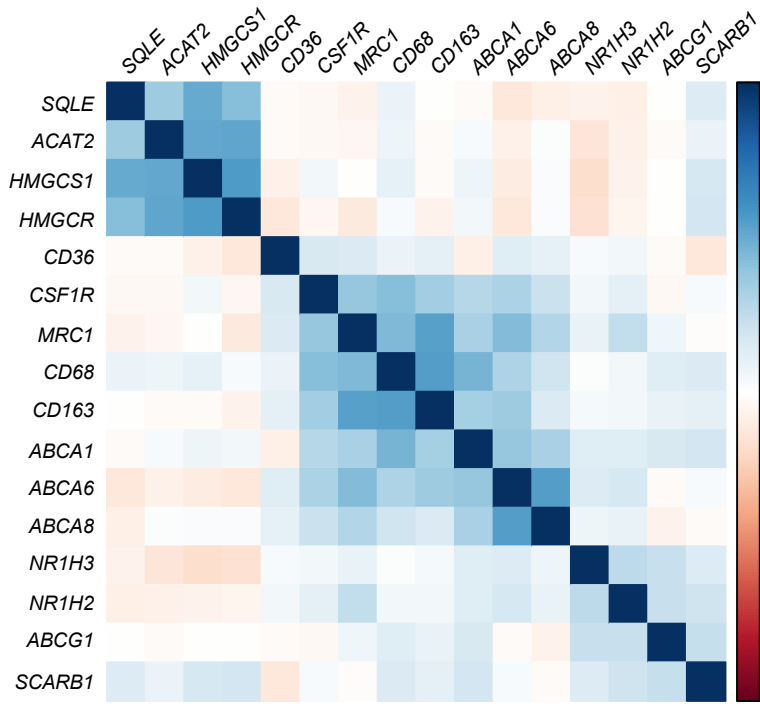

**B**

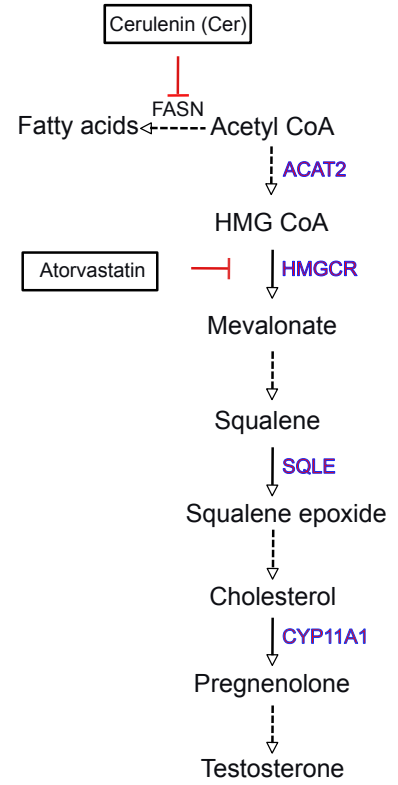

**C**

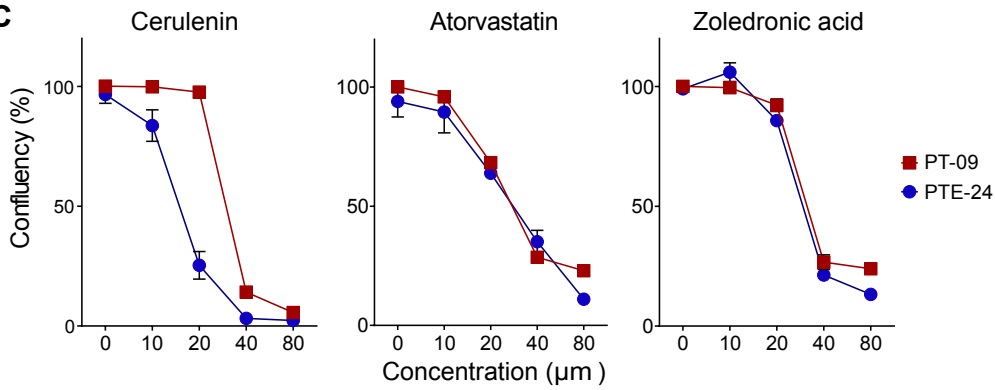

**D**

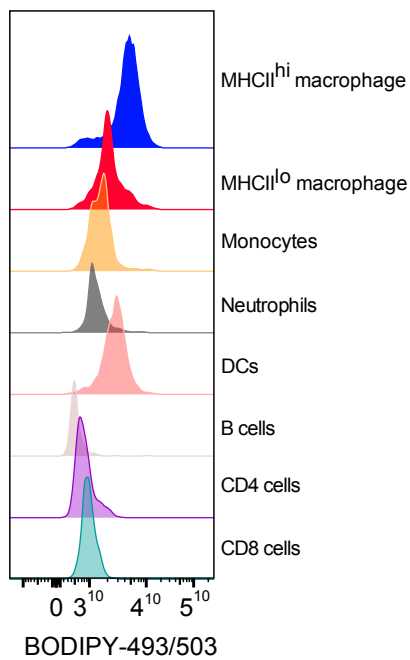

**E**

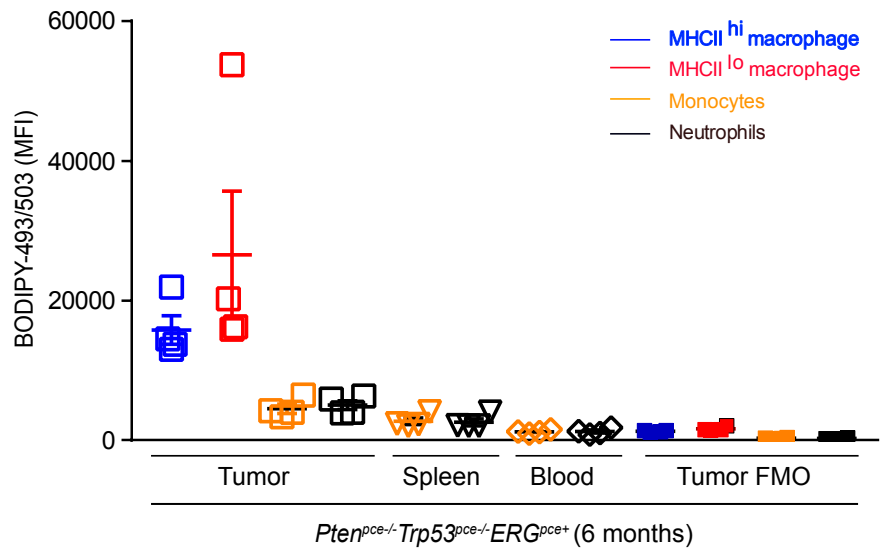

**Supplemental Figure 4, Related to Figure 4. A)** Intergene correlation analysis of genes associated with macrophage infiltration (*CD86*, *CSF1R*, *MRC1*, *CD163*) and the indicated metabolic genes using whole transcriptome data from the Decipher GRID™ registry data. B) *De novo* cholesterol biosynthesis pathway. C) Impact of the cholesterol biosynthesis pathway targeting agents cerulenin (inhibits FASN), atorvastatin (inhibits HMGCR) and zoledronic acid (inhibits farnesyl diphosphate synthase) on proliferation of PTE-24 and PT-09. D) Histogram of BODIPY-493/503 fluorescence in leukocyte populations within PTE-82 tumors. n=5, data reflects one of at least three independent experiments. E) Mean BODIPY-493/503 fluorescence intensity in myeloid populations within tumors from *Pten*<sup>pce-/-</sup>/*Trp53*<sup>pce-/-</sup>/*TMPRSS2-ERG*<sup>pce+</sup> mice, 6 months post tamoxifen. Fluorescence minus one (FMO) is shown for tumor samples. n=4, data shown as the mean ± SEM. Similar results were observed in orthotopic models and 12 months post tamoxifen in *Pten*<sup>pce-/-</sup>/*Trp53*<sup>pce-/-</sup> and *Pten*<sup>pce-/-</sup>/*Trp53*<sup>pce-/-</sup>/*TMPRSS2-ERG*<sup>pce+</sup> models.
