# Supplementary material
Source: PubMed Central journal article supplement (PMC8563406)
Supplement: NIHMS1729167-supplement-7.pdf [file NIHMS1729167-supplement-7.pdf]

**Figure S5**

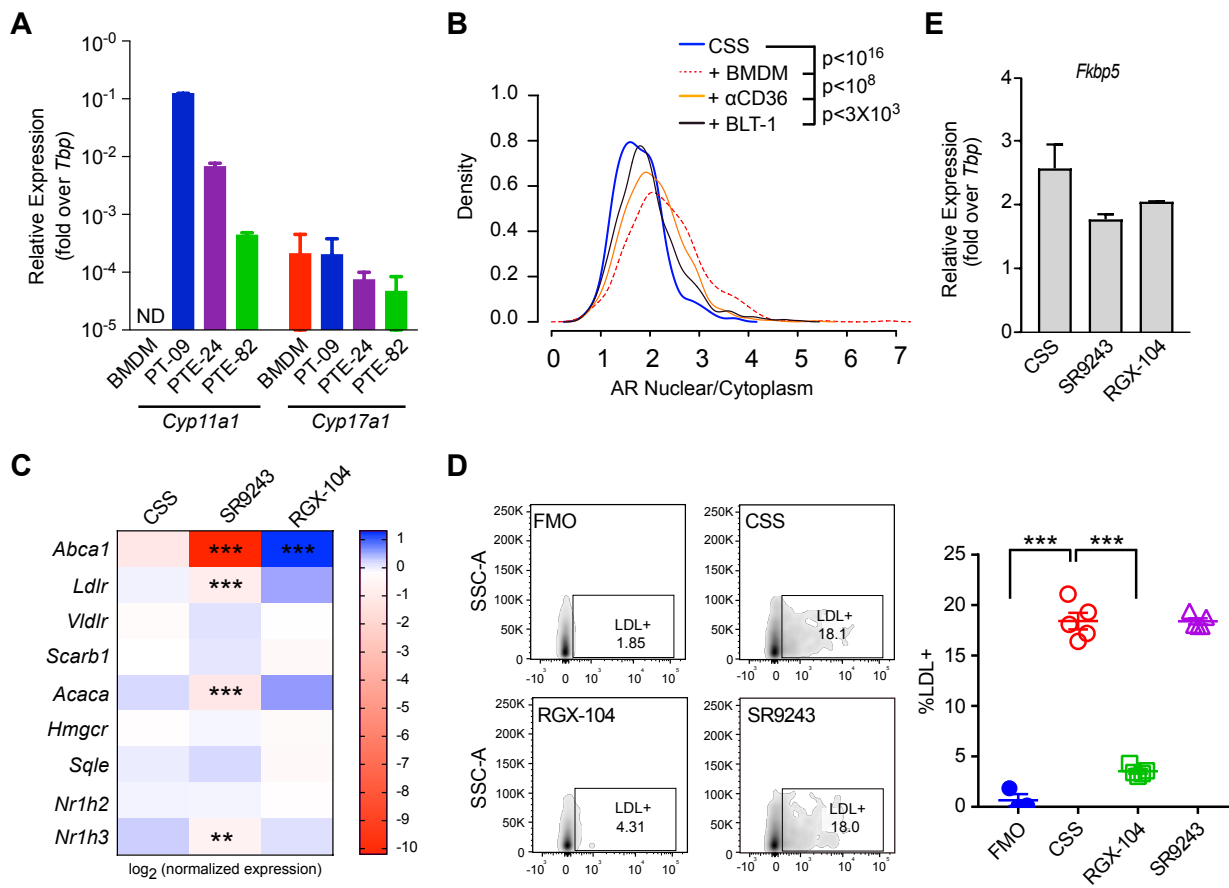

**Supplemental Figure 5, Related to Figure 5.** A) Expression of *Cyp11a1* and *Cyp17a1* in prostate cancer cell lines and BMDMs, as determined by real time PCR. n=3-5, data shown as the mean  $\pm$  SEM from one experiment. B) Nuclear to cytoplasmic AR ratio of GFP<sup>+</sup> PTE-82 cells cultured in CSS or co-cultured with BMDMs. 1  $\mu$ M BLT-1 (SCARB1 inhibitor) and 5  $\mu$ g/ml  $\alpha$ CD36 were added to co-cultures as indicated. 6-8 randomly selected images from two wells of the chamber slide were pooled for analysis. Data reflects one of two independent experiments. Significance determined by Mann-Whitney. C) PTE-82 cells were treated with the LXR modulators RGX-104 (5  $\mu$ M) and SR9243 (5  $\mu$ M) for 48 hrs and effects on gene expression related to cholesterol influx/efflux (*Abca1*, *Ldlr*, *Vldlr*, *Scarb1*), cholesterol *de novo* synthesis (*Acaca*, *Hmgcr*, *Sqle*), and the LXR family (*Nr1h2*, *Nr1H3*) were determined by real time PCR. Expression was normalized across groups and is shown as a heat map. Data represents the mean of 3 technical replicates, with significance determined by two-way ANOVA. One of two representative experiments is shown. D) PTE-82 cells were treated with 5  $\mu$ M RGX-104 and 5  $\mu$ M SR9243 for 48 h and uptake of pHrodo Red labeled LDL (1  $\mu$ g/ml) was measured by flow cytometry after a 3 hr incubation. Data shown as the mean  $\pm$  SEM of 3-5 technical replicates, with significance determined by one-way ANOVA. One of three representative experiments is shown. E) PTE-82 cells were treated with 5  $\mu$ M RGX-104 and 5  $\mu$ M SR9243 for 48 hrs and expression of the androgen responsive gene, *Fkbp5* was determined by real time PCR. n=3, data shown as the mean  $\pm$  SEM with one of two representative experiments shown.
